# Supplementary material
Source: publisher figshare collection journal article supplement (https://acs.figshare.com/ndownloader/files/5073775)
Supplement: Supplementary file 1 [file 5073775]

  
data_040419a 
  
_audit_creation_method            SHELXL-97 
_chemical_name_systematic 
; 
 ? 
; 
_chemical_name_common             ? 
_chemical_melting_point           ? 
_chemical_formula_moiety          ? 
_chemical_formula_sum 
 'C66 H62 Fe I N18 O7 Ru2' 
_chemical_formula_weight          1604.23 
  
loop_ 
 _atom_type_symbol 
 _atom_type_description 
 _atom_type_scat_dispersion_real 
 _atom_type_scat_dispersion_imag 
 _atom_type_scat_source 
 'C'  'C'   0.0033   0.0016 
 'International Tables Vol C Tables 4.2.6.8 and 6.1.1.4' 
 'H'  'H'   0.0000   0.0000 
 'International Tables Vol C Tables 4.2.6.8 and 6.1.1.4' 
 'N'  'N'   0.0061   0.0033 
 'International Tables Vol C Tables 4.2.6.8 and 6.1.1.4' 
 'O'  'O'   0.0106   0.0060 
 'International Tables Vol C Tables 4.2.6.8 and 6.1.1.4' 
 'Fe'  'Fe'   0.3463   0.8444 
 'International Tables Vol C Tables 4.2.6.8 and 6.1.1.4' 
 'Ru'  'Ru'  -1.2594   0.8363 
 'International Tables Vol C Tables 4.2.6.8 and 6.1.1.4' 
 'I'  'I'  -0.4742   1.8119 
 'International Tables Vol C Tables 4.2.6.8 and 6.1.1.4' 
  
_symmetry_cell_setting            Monoclinic 
_symmetry_space_group_name_H-M    Cc 
  
loop_ 
 _symmetry_equiv_pos_as_xyz 
 'x, y, z' 
 'x, -y, z+1/2' 
 'x+1/2, y+1/2, z' 
 'x+1/2, -y+1/2, z+1/2' 
  
_cell_length_a                    12.922(4) 
_cell_length_b                    23.713(7) 
_cell_length_c                    21.776(6) 
_cell_angle_alpha                 90.00 
_cell_angle_beta                  90.705(5) 
_cell_angle_gamma                 90.00 
_cell_volume                      6672(3) 
_cell_formula_units_Z             4 
_cell_measurement_temperature     293(2) 
_cell_measurement_reflns_used     877 
_cell_measurement_theta_min       2.61 
_cell_measurement_theta_max       23.32 
  
_exptl_crystal_description        ? 
_exptl_crystal_colour             ? 
_exptl_crystal_size_max           0.28 
_exptl_crystal_size_mid           0.26 
_exptl_crystal_size_min           0.20 
_exptl_crystal_density_meas       NONE 
_exptl_crystal_density_diffrn     1.597 
_exptl_crystal_density_method     'not measured' 
_exptl_crystal_F_000              3228 
_exptl_absorpt_coefficient_mu     1.192 
_exptl_absorpt_correction_type    MULTI-SCAN 
_exptl_absorpt_correction_T_min   0.828680 
_exptl_absorpt_correction_T_max   1.000000 
_exptl_absorpt_process_details    SADABS 
  
_exptl_special_details 
; 
 ? 
; 
  
_diffrn_ambient_temperature       293(2) 
_diffrn_radiation_wavelength      0.71073 
_diffrn_radiation_type            MoK\a 
_diffrn_radiation_source          'fine-focus sealed tube' 
_diffrn_radiation_monochromator   graphite 
_diffrn_measurement_device_type   'CCD area detector' 
_diffrn_measurement_method        'phi and omega scans' 
_diffrn_detector_area_resol_mean  ? 
_diffrn_standards_number          ? 
_diffrn_standards_interval_count  ? 
_diffrn_standards_interval_time   ? 
_diffrn_standards_decay_%         ? 
_diffrn_reflns_number             19315 
_diffrn_reflns_av_R_equivalents   0.0362 
_diffrn_reflns_av_sigmaI/netI     0.0678 
_diffrn_reflns_limit_h_min        -12 
_diffrn_reflns_limit_h_max        16 
_diffrn_reflns_limit_k_min        -29 
_diffrn_reflns_limit_k_max        16 
_diffrn_reflns_limit_l_min        -27 
_diffrn_reflns_limit_l_max        25 
_diffrn_reflns_theta_min          1.96 
_diffrn_reflns_theta_max          26.43 
_reflns_number_total              11045 
_reflns_number_gt                 8462 
_reflns_threshold_expression      >2sigma(I) 
  
_computing_data_collection        'Bruker SMART' 
_computing_cell_refinement        'Bruker SMART' 
_computing_data_reduction         'Bruker SAINT' 
_computing_structure_solution     'SHELXS-97 (Sheldrick, 1990)' 
_computing_structure_refinement   'SHELXL-97 (Sheldrick, 1997)' 
_computing_molecular_graphics     'Bruker SHELXTL' 
_computing_publication_material   'Bruker SHELXTL' 
  
_refine_special_details 
; 
 Refinement of F^2^ against ALL reflections.  The weighted R-factor wR and 
 goodness of fit S are based on F^2^, conventional R-factors R are based 
 on F, with F set to zero for negative F^2^. The threshold expression of 
 F^2^ > 2sigma(F^2^) is used only for calculating R-factors(gt) etc. and is 
 not relevant to the choice of reflections for refinement.  R-factors based 
 on F^2^ are statistically about twice as large as those based on F, and R- 
 factors based on ALL data will be even larger. 
; 
  
_refine_ls_structure_factor_coef  Fsqd 
_refine_ls_matrix_type            full 
_refine_ls_weighting_scheme       calc 
_refine_ls_weighting_details 
 'calc w=1/[\s^2^(Fo^2^)+(0.0227P)^2^+4.2429P] where P=(Fo^2^+2Fc^2^)/3' 
_atom_sites_solution_primary      direct 
_atom_sites_solution_secondary    difmap 
_atom_sites_solution_hydrogens    geom 
_refine_ls_hydrogen_treatment     mixed 
_refine_ls_extinction_method      none 
_refine_ls_extinction_coef        ? 
_refine_ls_abs_structure_details 
 'Flack H D (1983), Acta Cryst. A39, 876-881' 
_refine_ls_abs_structure_Flack    0.184(18) 
_refine_ls_number_reflns          11045 
_refine_ls_number_parameters      857 
_refine_ls_number_restraints      2 
_refine_ls_R_factor_all           0.0686 
_refine_ls_R_factor_gt            0.0411 
_refine_ls_wR_factor_ref          0.0768 
_refine_ls_wR_factor_gt           0.0686 
_refine_ls_goodness_of_fit_ref    1.015 
_refine_ls_restrained_S_all       1.015 
_refine_ls_shift/su_max           0.002 
_refine_ls_shift/su_mean          0.000 
  
loop_ 
 _atom_site_label 
 _atom_site_type_symbol 
 _atom_site_fract_x 
 _atom_site_fract_y 
 _atom_site_fract_z 
 _atom_site_U_iso_or_equiv 
 _atom_site_adp_type 
 _atom_site_occupancy 
 _atom_site_symmetry_multiplicity 
 _atom_site_calc_flag 
 _atom_site_refinement_flags 
 _atom_site_disorder_assembly 
 _atom_site_disorder_group 
Ru1 Ru 0.89953(3) 0.674494(18) 0.67490(2) 0.03100(12) Uani 1 1 d . . . 
Ru2 Ru 0.90323(4) 0.662529(17) 0.18636(2) 0.03048(11) Uani 1 1 d . . . 
Fe1 Fe 0.40993(9) 0.50326(4) 0.93150(5) 0.03102(19) Uani 1 1 d . . . 
I1 I 0.01193(4) 0.672554(19) 0.93087(2) 0.05978(15) Uani 1 1 d . . . 
N1 N 1.0303(4) 0.6662(2) 0.6213(2) 0.0325(11) Uani 1 1 d . . . 
N2 N 0.9852(4) 0.61642(19) 0.7259(2) 0.0329(12) Uani 1 1 d . . . 
N3 N 0.8206(4) 0.6098(2) 0.6321(2) 0.0331(12) Uani 1 1 d . . . 
N4 N 0.7698(4) 0.6685(2) 0.7293(2) 0.0349(12) Uani 1 1 d . . . 
N5 N 0.8389(4) 0.7370(2) 0.6195(2) 0.0385(13) Uani 1 1 d . . . 
N6 N 0.9520(4) 0.74611(19) 0.7192(2) 0.0336(12) Uani 1 1 d . . . 
N7 N 0.9919(4) 0.6057(2) 0.1382(2) 0.0353(13) Uani 1 1 d . . . 
N8 N 1.0310(4) 0.6543(2) 0.2441(2) 0.0317(12) Uani 1 1 d . . . 
N9 N 0.9579(4) 0.7344(2) 0.1440(2) 0.0342(12) Uani 1 1 d . . . 
N10 N 0.8374(4) 0.7246(2) 0.2390(2) 0.0350(12) Uani 1 1 d . . . 
N11 N 0.7761(4) 0.65780(19) 0.1281(2) 0.0349(13) Uani 1 1 d . . . 
N12 N 0.8209(4) 0.5982(2) 0.2266(2) 0.0324(12) Uani 1 1 d . . . 
N13 N 0.4151(6) 0.5190(3) 1.0722(3) 0.0659(19) Uani 1 1 d . . . 
N14 N 0.4371(6) 0.3742(3) 0.9395(3) 0.074(2) Uani 1 1 d . . . 
N15 N 0.6472(5) 0.5181(3) 0.9297(3) 0.0632(18) Uani 1 1 d . . . 
N16 N 0.4058(6) 0.4885(3) 0.7913(3) 0.070(2) Uani 1 1 d . . . 
N17 N 0.4021(5) 0.6324(3) 0.9210(3) 0.0613(18) Uani 1 1 d . . . 
N18 N 0.1744(5) 0.4816(3) 0.9331(3) 0.0607(18) Uani 1 1 d . . . 
C1 C 1.0481(5) 0.6907(3) 0.5672(3) 0.0429(18) Uani 1 1 d . . . 
H1 H 1.0016 0.7179 0.5532 0.051 Uiso 1 1 calc R . . 
C2 C 1.1298(6) 0.6781(3) 0.5315(4) 0.051(2) Uani 1 1 d . . . 
H2 H 1.1383 0.6962 0.4940 0.061 Uiso 1 1 calc R . . 
C3 C 1.1998(6) 0.6386(3) 0.5511(3) 0.053(2) Uani 1 1 d . . . 
H3 H 1.2559 0.6291 0.5269 0.064 Uiso 1 1 calc R . . 
C4 C 1.1856(5) 0.6128(3) 0.6078(3) 0.0468(18) Uani 1 1 d . . . 
H4 H 1.2329 0.5863 0.6224 0.056 Uiso 1 1 calc R . . 
C5 C 1.1004(5) 0.6272(2) 0.6418(3) 0.0349(15) Uani 1 1 d . . . 
C6 C 1.0779(5) 0.6015(3) 0.7015(3) 0.0343(15) Uani 1 1 d . . . 
C7 C 1.1435(6) 0.5652(3) 0.7324(3) 0.0458(17) Uani 1 1 d . . . 
H7 H 1.2067 0.5555 0.7153 0.055 Uiso 1 1 calc R . . 
C8 C 1.1158(6) 0.5431(3) 0.7886(3) 0.049(2) Uani 1 1 d . . . 
H8 H 1.1601 0.5191 0.8101 0.059 Uiso 1 1 calc R . . 
C9 C 1.0220(6) 0.5575(3) 0.8116(3) 0.050(2) Uani 1 1 d . . . 
H9 H 1.0005 0.5425 0.8489 0.061 Uiso 1 1 calc R . . 
C10 C 0.9592(6) 0.5940(3) 0.7798(3) 0.0459(17) Uani 1 1 d . . . 
H10 H 0.8957 0.6037 0.7965 0.055 Uiso 1 1 calc R . . 
C11 C 0.8503(6) 0.5817(3) 0.5817(3) 0.0466(18) Uani 1 1 d . . . 
H11 H 0.9154 0.5892 0.5658 0.056 Uiso 1 1 calc R . . 
C12 C 0.7886(6) 0.5424(3) 0.5528(3) 0.052(2) Uani 1 1 d . . . 
H12 H 0.8123 0.5234 0.5183 0.063 Uiso 1 1 calc R . . 
C13 C 0.6911(6) 0.5313(3) 0.5752(3) 0.0497(19) Uani 1 1 d . . . 
H13 H 0.6475 0.5056 0.5557 0.060 Uiso 1 1 calc R . . 
C14 C 0.6607(5) 0.5595(3) 0.6272(3) 0.0408(16) Uani 1 1 d . . . 
H14 H 0.5955 0.5528 0.6433 0.049 Uiso 1 1 calc R . . 
C15 C 0.7266(5) 0.5978(3) 0.6557(3) 0.0330(14) Uani 1 1 d . . . 
C16 C 0.6995(5) 0.6288(3) 0.7117(3) 0.0351(15) Uani 1 1 d . . . 
C17 C 0.6141(6) 0.6169(3) 0.7469(3) 0.0495(18) Uani 1 1 d . . . 
H17 H 0.5669 0.5898 0.7336 0.059 Uiso 1 1 calc R . . 
C18 C 0.5980(6) 0.6444(3) 0.8010(3) 0.053(2) Uani 1 1 d . . . 
H18 H 0.5417 0.6355 0.8254 0.064 Uiso 1 1 calc R . . 
C19 C 0.6671(6) 0.6854(3) 0.8184(3) 0.052(2) Uani 1 1 d . . . 
H19 H 0.6574 0.7056 0.8546 0.062 Uiso 1 1 calc R . . 
C20 C 0.7504(6) 0.6965(3) 0.7820(3) 0.0492(19) Uani 1 1 d . . . 
H20 H 0.7961 0.7247 0.7942 0.059 Uiso 1 1 calc R . . 
C21 C 0.7884(5) 0.7296(3) 0.5660(3) 0.0496(18) Uani 1 1 d . . . 
H21 H 0.7715 0.6931 0.5538 0.060 Uiso 1 1 calc R . . 
C22 C 0.7601(6) 0.7748(4) 0.5277(3) 0.061(2) Uani 1 1 d . . . 
H22 H 0.7255 0.7684 0.4907 0.073 Uiso 1 1 calc R . . 
C23 C 0.7837(6) 0.8273(4) 0.5455(4) 0.067(2) Uani 1 1 d . . . 
H23 H 0.7654 0.8578 0.5207 0.080 Uiso 1 1 calc R . . 
C24 C 0.8344(6) 0.8364(3) 0.6000(4) 0.060(2) Uani 1 1 d . . . 
H24 H 0.8501 0.8730 0.6124 0.072 Uiso 1 1 calc R . . 
C25 C 0.8623(5) 0.7913(3) 0.6367(3) 0.0389(15) Uani 1 1 d . . . 
C26 C 0.9184(5) 0.7961(2) 0.6950(3) 0.0413(17) Uani 1 1 d . . . 
C27 C 0.9368(6) 0.8464(3) 0.7257(3) 0.0530(18) Uani 1 1 d . . . 
H27 H 0.9180 0.8804 0.7074 0.064 Uiso 1 1 calc R . . 
C28 C 0.9823(6) 0.8463(3) 0.7827(4) 0.055(2) Uani 1 1 d . . . 
H28 H 0.9913 0.8798 0.8043 0.065 Uiso 1 1 calc R . . 
C29 C 1.0145(6) 0.7959(3) 0.8078(3) 0.0530(19) Uani 1 1 d . . . 
H29 H 1.0456 0.7949 0.8466 0.064 Uiso 1 1 calc R . . 
C30 C 1.0001(5) 0.7472(3) 0.7748(3) 0.0450(17) Uani 1 1 d . . . 
H30 H 1.0244 0.7134 0.7914 0.054 Uiso 1 1 calc R . . 
C31 C 0.9702(6) 0.5844(3) 0.0823(3) 0.0459(17) Uani 1 1 d . . . 
H31 H 0.9075 0.5937 0.0635 0.055 Uiso 1 1 calc R . . 
C32 C 1.0379(7) 0.5489(3) 0.0516(4) 0.059(2) Uani 1 1 d . . . 
H32 H 1.0209 0.5355 0.0126 0.071 Uiso 1 1 calc R . . 
C33 C 1.1298(6) 0.5339(3) 0.0791(4) 0.054(2) Uani 1 1 d . . . 
H33 H 1.1756 0.5099 0.0594 0.064 Uiso 1 1 calc R . . 
C34 C 1.1530(6) 0.5554(3) 0.1366(3) 0.0468(18) Uani 1 1 d . . . 
H34 H 1.2150 0.5459 0.1562 0.056 Uiso 1 1 calc R . . 
C35 C 1.0836(5) 0.5911(3) 0.1651(3) 0.0333(14) Uani 1 1 d . . . 
C36 C 1.1028(5) 0.6161(3) 0.2265(3) 0.0352(15) Uani 1 1 d . . . 
C37 C 1.1870(5) 0.6030(3) 0.2629(3) 0.0465(18) Uani 1 1 d . . . 
H37 H 1.2359 0.5771 0.2495 0.056 Uiso 1 1 calc R . . 
C38 C 1.1985(6) 0.6287(3) 0.3193(3) 0.0486(18) Uani 1 1 d . . . 
H38 H 1.2549 0.6201 0.3446 0.058 Uiso 1 1 calc R . . 
C39 C 1.1275(6) 0.6662(3) 0.3372(3) 0.0501(19) Uani 1 1 d . . . 
H39 H 1.1337 0.6834 0.3754 0.060 Uiso 1 1 calc R . . 
C40 C 1.0457(5) 0.6791(3) 0.2991(3) 0.0421(16) Uani 1 1 d . . . 
H40 H 0.9984 0.7062 0.3118 0.051 Uiso 1 1 calc R . . 
C41 C 1.0104(5) 0.7357(3) 0.0920(3) 0.0438(17) Uani 1 1 d . . . 
H41 H 1.0378 0.7023 0.0770 0.053 Uiso 1 1 calc R . . 
C42 C 1.0259(6) 0.7849(3) 0.0596(3) 0.0512(19) Uani 1 1 d . . . 
H42 H 1.0598 0.7842 0.0222 0.061 Uiso 1 1 calc R . . 
C43 C 0.9901(6) 0.8354(3) 0.0835(3) 0.054(2) Uani 1 1 d . . . 
H43 H 1.0013 0.8693 0.0631 0.065 Uiso 1 1 calc R . . 
C44 C 0.9385(5) 0.8343(3) 0.1371(3) 0.0497(17) Uani 1 1 d . . . 
H44 H 0.9145 0.8676 0.1543 0.060 Uiso 1 1 calc R . . 
C45 C 0.9215(5) 0.7832(3) 0.1665(3) 0.0361(16) Uani 1 1 d . . . 
C46 C 0.8607(5) 0.7786(3) 0.2221(3) 0.0419(16) Uani 1 1 d . . . 
C47 C 0.8287(6) 0.8238(3) 0.2568(3) 0.0543(19) Uani 1 1 d . . . 
H47 H 0.8448 0.8601 0.2441 0.065 Uiso 1 1 calc R . . 
C48 C 0.7741(6) 0.8165(4) 0.3093(4) 0.056(2) Uani 1 1 d . . . 
H48 H 0.7526 0.8471 0.3326 0.068 Uiso 1 1 calc R . . 
C49 C 0.7519(6) 0.7620(3) 0.3264(3) 0.056(2) Uani 1 1 d . . . 
H49 H 0.7158 0.7553 0.3624 0.067 Uiso 1 1 calc R . . 
C50 C 0.7826(5) 0.7171(3) 0.2906(3) 0.0451(17) Uani 1 1 d . . . 
H50 H 0.7650 0.6807 0.3024 0.054 Uiso 1 1 calc R . . 
C51 C 0.7604(6) 0.6862(3) 0.0746(3) 0.0428(19) Uani 1 1 d . . . 
H51 H 0.8088 0.7132 0.0635 0.051 Uiso 1 1 calc R . . 
C52 C 0.6773(6) 0.6771(3) 0.0362(3) 0.0519(19) Uani 1 1 d . . . 
H52 H 0.6706 0.6971 -0.0004 0.062 Uiso 1 1 calc R . . 
C53 C 0.6036(6) 0.6379(3) 0.0527(3) 0.056(2) Uani 1 1 d . . . 
H53 H 0.5458 0.6315 0.0278 0.067 Uiso 1 1 calc R . . 
C54 C 0.6175(5) 0.6086(3) 0.1067(3) 0.0466(18) Uani 1 1 d . . . 
H54 H 0.5697 0.5814 0.1180 0.056 Uiso 1 1 calc R . . 
C55 C 0.7027(5) 0.6195(3) 0.1443(3) 0.0340(15) Uani 1 1 d . . . 
C56 C 0.7264(5) 0.5882(2) 0.2004(3) 0.0342(15) Uani 1 1 d . . . 
C57 C 0.6569(5) 0.5519(3) 0.2286(3) 0.0481(18) Uani 1 1 d . . . 
H57 H 0.5916 0.5459 0.2114 0.058 Uiso 1 1 calc R . . 
C58 C 0.6859(6) 0.5250(3) 0.2825(3) 0.054(2) Uani 1 1 d . . . 
H58 H 0.6393 0.5015 0.3024 0.065 Uiso 1 1 calc R . . 
C59 C 0.7821(6) 0.5327(3) 0.3063(3) 0.0499(19) Uani 1 1 d . . . 
H59 H 0.8035 0.5134 0.3414 0.060 Uiso 1 1 calc R . . 
C60 C 0.8479(5) 0.5699(3) 0.2776(3) 0.0446(17) Uani 1 1 d . . . 
H60 H 0.9137 0.5755 0.2943 0.053 Uiso 1 1 calc R . . 
C61 C 0.4116(6) 0.5124(3) 1.0200(3) 0.0404(16) Uani 1 1 d . . . 
C62 C 0.4266(5) 0.4224(3) 0.9383(3) 0.0431(17) Uani 1 1 d . . . 
C63 C 0.5590(6) 0.5119(3) 0.9304(3) 0.0421(18) Uani 1 1 d . . . 
C64 C 0.4055(6) 0.4953(3) 0.8434(3) 0.0428(18) Uani 1 1 d . . . 
C65 C 0.4011(6) 0.5849(3) 0.9247(3) 0.0402(15) Uani 1 1 d . . . 
C66 C 0.2616(6) 0.4914(3) 0.9330(3) 0.0406(17) Uani 1 1 d . . . 
O1 O 0.4982(5) 0.74254(19) 0.9288(3) 0.0722(16) Uani 1 1 d . . . 
H1A H 0.4775 0.7087 0.9253 0.108 Uiso 1 1 d R . . 
H1B H 0.4642 0.7605 0.9563 0.108 Uiso 1 1 d R . . 
O2 O 0.8571(4) 0.54795(19) 0.9358(3) 0.0655(15) Uani 1 1 d . . . 
H2A H 0.7910 0.5460 0.9342 0.098 Uiso 1 1 d R . . 
H2B H 0.8778 0.5813 0.9295 0.098 Uiso 1 1 d R . . 
O3 O 0.3050(5) 0.7290(2) 0.4324(3) 0.093(2) Uani 1 1 d . . . 
H3A H 0.3556 0.7479 0.4188 0.139 Uiso 1 1 d R . . 
H3B H 0.3159 0.6936 0.4297 0.139 Uiso 1 1 d R . . 
O4 O 0.3915(6) 0.53962(18) 0.6803(3) 0.0824(17) Uani 1 1 d . . . 
H4A H 0.4008 0.5342 0.6422 0.124 Uiso 1 1 d R . . 
H4B H 0.3973 0.5088 0.7002 0.124 Uiso 1 1 d R . . 
O5 O 0.9687(4) 0.4443(2) 0.9263(3) 0.087(2) Uani 1 1 d . . . 
H5A H 1.0313 0.4534 0.9327 0.131 Uiso 1 1 d R . . 
H5B H 0.9292 0.4724 0.9303 0.131 Uiso 1 1 d R . . 
O6 O 0.8740(4) 0.34089(19) 0.9317(3) 0.095(2) Uani 1 1 d . . . 
H6A H 0.9099 0.3111 0.9302 0.143 Uiso 1 1 d R . . 
H6B H 0.8704 0.3698 0.9552 0.143 Uiso 1 1 d R . . 
O7 O 0.6677(5) 0.3736(3) 0.9268(4) 0.155(3) Uani 1 1 d . . . 
H7A H 0.6035 0.3768 0.9334 0.233 Uiso 1 1 d R . . 
H7B H 0.6971 0.4054 0.9260 0.233 Uiso 1 1 d R . . 
  
loop_ 
 _atom_site_aniso_label 
 _atom_site_aniso_U_11 
 _atom_site_aniso_U_22 
 _atom_site_aniso_U_33 
 _atom_site_aniso_U_23 
 _atom_site_aniso_U_13 
 _atom_site_aniso_U_12 
Ru1 0.0303(3) 0.0326(3) 0.0302(3) -0.0005(2) 0.0024(2) -0.0012(3) 
Ru2 0.0274(2) 0.0345(2) 0.0294(3) -0.0006(2) -0.0018(2) 0.0008(3) 
Fe1 0.0274(5) 0.0380(5) 0.0277(4) 0.0013(3) 0.0000(3) 0.0009(4) 
I1 0.0809(4) 0.0516(3) 0.0468(3) -0.0022(2) -0.0026(3) -0.0131(3) 
N1 0.030(3) 0.037(3) 0.031(3) 0.004(2) 0.001(2) 0.001(2) 
N2 0.041(4) 0.028(3) 0.031(3) 0.002(2) 0.002(2) -0.008(2) 
N3 0.029(3) 0.037(3) 0.033(3) -0.005(2) 0.000(2) 0.002(2) 
N4 0.041(3) 0.037(3) 0.027(3) -0.003(2) 0.005(2) 0.004(3) 
N5 0.032(3) 0.052(4) 0.031(3) 0.007(2) 0.004(2) 0.005(2) 
N6 0.035(3) 0.031(3) 0.035(3) 0.002(2) 0.002(2) -0.006(2) 
N7 0.042(4) 0.032(3) 0.032(3) 0.002(2) -0.005(3) -0.001(2) 
N8 0.024(3) 0.040(3) 0.031(3) -0.002(2) -0.001(2) 0.002(2) 
N9 0.032(3) 0.042(3) 0.029(3) -0.004(2) -0.002(2) -0.002(2) 
N10 0.029(3) 0.044(3) 0.032(3) -0.001(2) 0.000(2) 0.008(2) 
N11 0.035(3) 0.036(3) 0.033(3) -0.003(2) 0.000(2) 0.004(2) 
N12 0.025(3) 0.039(3) 0.033(3) 0.000(2) 0.003(2) 0.002(2) 
N13 0.077(5) 0.083(5) 0.038(4) -0.002(3) -0.004(3) -0.022(4) 
N14 0.102(6) 0.047(4) 0.073(5) 0.007(4) -0.002(4) 0.010(4) 
N15 0.033(4) 0.099(5) 0.058(4) 0.000(4) -0.001(3) -0.002(3) 
N16 0.085(6) 0.096(5) 0.029(4) 0.004(3) 0.007(3) 0.015(4) 
N17 0.071(5) 0.043(4) 0.070(5) 0.006(3) 0.007(4) -0.001(4) 
N18 0.036(4) 0.086(5) 0.060(4) -0.011(4) 0.003(3) -0.011(3) 
C1 0.039(4) 0.056(5) 0.035(4) 0.015(3) 0.002(3) 0.003(3) 
C2 0.050(5) 0.055(5) 0.048(4) 0.015(4) 0.010(4) -0.004(4) 
C3 0.050(5) 0.066(5) 0.044(4) 0.005(3) 0.018(4) 0.002(4) 
C4 0.035(4) 0.055(5) 0.050(4) 0.007(3) 0.006(3) 0.009(3) 
C5 0.033(4) 0.034(4) 0.037(3) 0.000(3) 0.003(3) -0.006(3) 
C6 0.040(4) 0.031(4) 0.032(3) 0.001(3) -0.001(3) -0.001(3) 
C7 0.044(5) 0.048(4) 0.045(4) 0.006(3) 0.002(3) -0.002(3) 
C8 0.064(6) 0.036(4) 0.048(4) 0.010(3) -0.008(4) 0.012(3) 
C9 0.078(6) 0.041(4) 0.032(4) 0.010(3) 0.007(4) 0.004(4) 
C10 0.050(5) 0.051(4) 0.037(4) 0.003(3) 0.007(4) 0.003(3) 
C11 0.047(5) 0.052(4) 0.042(4) -0.008(3) 0.012(3) -0.002(3) 
C12 0.059(6) 0.050(5) 0.048(4) -0.016(3) -0.001(4) -0.005(4) 
C13 0.062(6) 0.047(4) 0.040(4) -0.007(3) -0.010(4) -0.009(4) 
C14 0.036(4) 0.037(4) 0.049(4) -0.001(3) -0.003(3) -0.012(3) 
C15 0.028(4) 0.038(4) 0.033(3) 0.002(3) 0.000(3) 0.001(3) 
C16 0.028(4) 0.043(4) 0.034(3) 0.005(3) 0.001(3) 0.001(3) 
C17 0.044(5) 0.061(5) 0.043(4) 0.001(3) 0.007(3) -0.010(4) 
C18 0.035(5) 0.063(5) 0.063(5) 0.006(4) 0.008(4) -0.002(4) 
C19 0.042(5) 0.072(6) 0.041(4) -0.015(4) 0.019(4) 0.008(4) 
C20 0.061(5) 0.048(4) 0.039(4) -0.011(3) 0.006(4) -0.007(4) 
C21 0.040(4) 0.065(5) 0.044(4) 0.005(3) 0.002(3) 0.012(3) 
C22 0.048(5) 0.085(6) 0.050(5) 0.018(4) -0.004(4) 0.020(4) 
C23 0.058(5) 0.068(6) 0.075(6) 0.035(5) 0.006(5) 0.019(5) 
C24 0.059(5) 0.055(5) 0.067(5) 0.025(4) 0.015(4) 0.014(4) 
C25 0.033(4) 0.039(4) 0.045(4) 0.008(3) 0.013(3) 0.007(3) 
C26 0.037(5) 0.030(3) 0.057(5) 0.008(3) 0.015(4) -0.002(3) 
C27 0.053(5) 0.039(4) 0.067(5) 0.001(3) 0.013(4) -0.001(3) 
C28 0.056(5) 0.041(4) 0.067(5) -0.015(4) 0.019(4) -0.008(3) 
C29 0.052(5) 0.059(5) 0.048(4) -0.014(4) -0.004(4) -0.006(4) 
C30 0.046(5) 0.039(4) 0.050(4) 0.001(3) 0.001(3) 0.001(3) 
C31 0.048(4) 0.051(4) 0.038(4) -0.005(3) -0.003(3) 0.004(3) 
C32 0.076(6) 0.051(5) 0.050(5) -0.023(4) 0.002(4) 0.002(4) 
C33 0.052(5) 0.044(5) 0.066(5) -0.011(4) 0.008(4) 0.012(4) 
C34 0.047(5) 0.047(4) 0.046(4) -0.001(3) -0.001(3) 0.011(4) 
C35 0.029(4) 0.035(4) 0.036(3) 0.003(3) 0.000(3) -0.003(3) 
C36 0.037(4) 0.042(4) 0.027(3) 0.000(3) -0.001(3) -0.006(3) 
C37 0.034(4) 0.057(5) 0.048(4) 0.003(3) -0.008(3) 0.005(3) 
C38 0.036(4) 0.065(5) 0.044(4) 0.008(3) -0.015(3) 0.001(4) 
C39 0.053(5) 0.058(5) 0.039(4) -0.004(3) -0.017(3) -0.007(4) 
C40 0.043(4) 0.044(4) 0.039(4) -0.004(3) -0.007(3) 0.003(3) 
C41 0.045(4) 0.038(4) 0.048(4) 0.000(3) 0.007(3) 0.001(3) 
C42 0.055(5) 0.053(5) 0.046(4) -0.002(4) 0.003(4) -0.019(4) 
C43 0.058(5) 0.044(5) 0.061(5) 0.019(4) -0.011(4) -0.026(4) 
C44 0.056(5) 0.040(4) 0.053(4) -0.005(3) -0.004(4) 0.002(3) 
C45 0.035(5) 0.032(3) 0.042(4) 0.000(3) -0.001(3) 0.004(3) 
C46 0.033(4) 0.052(4) 0.041(4) -0.007(3) -0.010(3) 0.010(3) 
C47 0.056(5) 0.037(4) 0.070(5) -0.016(4) -0.006(4) 0.015(4) 
C48 0.041(5) 0.065(6) 0.063(5) -0.028(4) -0.006(4) 0.020(4) 
C49 0.049(5) 0.078(6) 0.041(4) -0.013(4) 0.001(3) 0.015(4) 
C50 0.033(4) 0.057(5) 0.045(4) -0.002(3) 0.001(3) 0.001(3) 
C51 0.049(5) 0.048(5) 0.031(4) 0.012(3) -0.011(3) -0.002(3) 
C52 0.052(5) 0.050(4) 0.053(4) 0.006(4) -0.018(4) 0.001(4) 
C53 0.049(5) 0.063(5) 0.055(5) -0.004(4) -0.025(4) 0.000(4) 
C54 0.034(4) 0.048(4) 0.057(5) -0.007(3) -0.010(3) -0.007(3) 
C55 0.029(4) 0.035(4) 0.038(4) -0.008(3) 0.004(3) -0.002(3) 
C56 0.034(4) 0.029(4) 0.040(4) -0.001(3) 0.002(3) 0.002(3) 
C57 0.034(4) 0.062(5) 0.048(4) 0.001(3) 0.001(3) -0.004(4) 
C58 0.056(5) 0.058(5) 0.048(5) 0.007(4) 0.014(4) -0.008(4) 
C59 0.051(5) 0.057(5) 0.041(4) 0.018(3) 0.005(4) -0.001(4) 
C60 0.042(4) 0.048(4) 0.044(4) 0.009(3) -0.008(3) 0.002(3) 
C61 0.037(4) 0.044(4) 0.041(4) 0.001(3) 0.002(3) -0.001(3) 
C62 0.044(5) 0.050(5) 0.035(4) 0.002(3) 0.001(3) -0.002(3) 
C63 0.035(4) 0.058(5) 0.034(4) 0.001(3) -0.005(3) 0.002(3) 
C64 0.043(4) 0.046(4) 0.040(4) 0.002(3) -0.003(3) 0.003(3) 
C65 0.040(4) 0.043(4) 0.037(4) 0.000(3) 0.002(3) 0.001(3) 
C66 0.042(5) 0.051(4) 0.028(3) -0.004(3) -0.003(3) 0.008(3) 
O1 0.064(4) 0.058(3) 0.095(4) -0.007(3) 0.006(3) -0.019(3) 
O2 0.033(3) 0.062(3) 0.102(4) 0.002(3) 0.002(3) -0.010(2) 
O3 0.051(4) 0.083(4) 0.144(6) 0.008(4) 0.001(4) -0.009(3) 
O4 0.137(5) 0.063(3) 0.048(3) 0.006(3) 0.014(3) 0.019(4) 
O5 0.049(4) 0.054(3) 0.159(6) 0.002(4) 0.000(4) -0.011(2) 
O6 0.081(5) 0.038(3) 0.166(6) -0.005(3) 0.005(4) 0.008(3) 
O7 0.070(5) 0.111(6) 0.284(11) -0.021(6) 0.004(6) 0.004(4) 
  
_geom_special_details 
; 
 All esds (except the esd in the dihedral angle between two l.s. planes) 
 are estimated using the full covariance matrix.  The cell esds are taken 
 into account individually in the estimation of esds in distances, angles 
 and torsion angles; correlations between esds in cell parameters are only 
 used when they are defined by crystal symmetry.  An approximate (isotropic) 
 treatment of cell esds is used for estimating esds involving l.s. planes. 
; 
  
loop_ 
 _geom_bond_atom_site_label_1 
 _geom_bond_atom_site_label_2 
 _geom_bond_distance 
 _geom_bond_site_symmetry_2 
 _geom_bond_publ_flag 
Ru1 N3 2.058(5) . ? 
Ru1 N5 2.060(5) . ? 
Ru1 N6 2.063(5) . ? 
Ru1 N4 2.070(5) . ? 
Ru1 N1 2.076(5) . ? 
Ru1 N2 2.080(5) . ? 
Ru2 N10 2.056(5) . ? 
Ru2 N12 2.061(5) . ? 
Ru2 N7 2.065(5) . ? 
Ru2 N9 2.066(5) . ? 
Ru2 N11 2.067(5) . ? 
Ru2 N8 2.072(5) . ? 
Fe1 C64 1.928(7) . ? 
Fe1 C62 1.935(7) . ? 
Fe1 C66 1.937(8) . ? 
Fe1 C63 1.938(8) . ? 
Fe1 C61 1.939(7) . ? 
Fe1 C65 1.945(7) . ? 
N1 C1 1.336(7) . ? 
N1 C5 1.366(8) . ? 
N2 C10 1.334(7) . ? 
N2 C6 1.363(8) . ? 
N3 C11 1.345(7) . ? 
N3 C15 1.355(7) . ? 
N4 C20 1.351(7) . ? 
N4 C16 1.360(8) . ? 
N5 C21 1.339(8) . ? 
N5 C25 1.374(8) . ? 
N6 C30 1.356(8) . ? 
N6 C26 1.366(7) . ? 
N7 C31 1.343(7) . ? 
N7 C35 1.360(8) . ? 
N8 C40 1.347(7) . ? 
N8 C36 1.355(8) . ? 
N9 C41 1.327(8) . ? 
N9 C45 1.343(7) . ? 
N10 C50 1.347(7) . ? 
N10 C46 1.367(8) . ? 
N11 C51 1.357(8) . ? 
N11 C55 1.363(7) . ? 
N12 C60 1.341(7) . ? 
N12 C56 1.363(8) . ? 
N13 C61 1.147(8) . ? 
N14 C62 1.151(7) . ? 
N15 C63 1.149(9) . ? 
N16 C64 1.145(8) . ? 
N17 C65 1.129(7) . ? 
N18 C66 1.152(9) . ? 
C1 C2 1.351(9) . ? 
C1 H1 0.9300 . ? 
C2 C3 1.367(10) . ? 
C2 H2 0.9300 . ? 
C3 C4 1.391(9) . ? 
C3 H3 0.9300 . ? 
C4 C5 1.378(8) . ? 
C4 H4 0.9300 . ? 
C5 C6 1.468(8) . ? 
C6 C7 1.378(9) . ? 
C7 C8 1.384(9) . ? 
C7 H7 0.9300 . ? 
C8 C9 1.361(10) . ? 
C8 H8 0.9300 . ? 
C9 C10 1.370(9) . ? 
C9 H9 0.9300 . ? 
C10 H10 0.9300 . ? 
C11 C12 1.375(9) . ? 
C11 H11 0.9300 . ? 
C12 C13 1.381(10) . ? 
C12 H12 0.9300 . ? 
C13 C14 1.377(9) . ? 
C13 H13 0.9300 . ? 
C14 C15 1.387(8) . ? 
C14 H14 0.9300 . ? 
C15 C16 1.470(8) . ? 
C16 C17 1.381(9) . ? 
C17 C18 1.365(9) . ? 
C17 H17 0.9300 . ? 
C18 C19 1.372(10) . ? 
C18 H18 0.9300 . ? 
C19 C20 1.370(10) . ? 
C19 H19 0.9300 . ? 
C20 H20 0.9300 . ? 
C21 C22 1.405(9) . ? 
C21 H21 0.9300 . ? 
C22 C23 1.338(11) . ? 
C22 H22 0.9300 . ? 
C23 C24 1.365(11) . ? 
C23 H23 0.9300 . ? 
C24 C25 1.381(9) . ? 
C24 H24 0.9300 . ? 
C25 C26 1.458(9) . ? 
C26 C27 1.386(9) . ? 
C27 C28 1.368(10) . ? 
C27 H27 0.9300 . ? 
C28 C29 1.377(10) . ? 
C28 H28 0.9300 . ? 
C29 C30 1.372(9) . ? 
C29 H29 0.9300 . ? 
C30 H30 0.9300 . ? 
C31 C32 1.392(9) . ? 
C31 H31 0.9300 . ? 
C32 C33 1.370(11) . ? 
C32 H32 0.9300 . ? 
C33 C34 1.382(9) . ? 
C33 H33 0.9300 . ? 
C34 C35 1.385(8) . ? 
C34 H34 0.9300 . ? 
C35 C36 1.480(8) . ? 
C36 C37 1.373(9) . ? 
C37 C38 1.377(9) . ? 
C37 H37 0.9300 . ? 
C38 C39 1.340(10) . ? 
C38 H38 0.9300 . ? 
C39 C40 1.370(9) . ? 
C39 H39 0.9300 . ? 
C40 H40 0.9300 . ? 
C41 C42 1.379(9) . ? 
C41 H41 0.9300 . ? 
C42 C43 1.389(10) . ? 
C42 H42 0.9300 . ? 
C43 C44 1.351(9) . ? 
C43 H43 0.9300 . ? 
C44 C45 1.390(8) . ? 
C44 H44 0.9300 . ? 
C45 C46 1.455(9) . ? 
C46 C47 1.377(8) . ? 
C47 C48 1.362(10) . ? 
C47 H47 0.9300 . ? 
C48 C49 1.377(10) . ? 
C48 H48 0.9300 . ? 
C49 C50 1.380(9) . ? 
C49 H49 0.9300 . ? 
C50 H50 0.9300 . ? 
C51 C52 1.370(10) . ? 
C51 H51 0.9300 . ? 
C52 C53 1.382(10) . ? 
C52 H52 0.9300 . ? 
C53 C54 1.375(9) . ? 
C53 H53 0.9300 . ? 
C54 C55 1.389(9) . ? 
C54 H54 0.9300 . ? 
C55 C56 1.458(8) . ? 
C56 C57 1.391(8) . ? 
C57 C58 1.385(10) . ? 
C57 H57 0.9300 . ? 
C58 C59 1.353(10) . ? 
C58 H58 0.9300 . ? 
C59 C60 1.379(9) . ? 
C59 H59 0.9300 . ? 
C60 H60 0.9300 . ? 
O1 H1A 0.8497 . ? 
O1 H1B 0.8593 . ? 
O2 H2A 0.8556 . ? 
O2 H2B 0.8475 . ? 
O3 H3A 0.8490 . ? 
O3 H3B 0.8521 . ? 
O4 H4A 0.8499 . ? 
O4 H4B 0.8536 . ? 
O5 H5A 0.8467 . ? 
O5 H5B 0.8456 . ? 
O6 H6A 0.8469 . ? 
O6 H6B 0.8564 . ? 
O7 H7A 0.8479 . ? 
O7 H7B 0.8451 . ? 
  
loop_ 
 _geom_angle_atom_site_label_1 
 _geom_angle_atom_site_label_2 
 _geom_angle_atom_site_label_3 
 _geom_angle 
 _geom_angle_site_symmetry_1 
 _geom_angle_site_symmetry_3 
 _geom_angle_publ_flag 
N3 Ru1 N5 95.1(2) . . ? 
N3 Ru1 N6 169.4(2) . . ? 
N5 Ru1 N6 78.6(2) . . ? 
N3 Ru1 N4 78.90(19) . . ? 
N5 Ru1 N4 94.6(2) . . ? 
N6 Ru1 N4 93.02(19) . . ? 
N3 Ru1 N1 94.46(19) . . ? 
N5 Ru1 N1 92.56(19) . . ? 
N6 Ru1 N1 94.32(19) . . ? 
N4 Ru1 N1 170.62(15) . . ? 
N3 Ru1 N2 90.36(16) . . ? 
N5 Ru1 N2 170.2(2) . . ? 
N6 Ru1 N2 97.21(19) . . ? 
N4 Ru1 N2 94.5(2) . . ? 
N1 Ru1 N2 78.82(19) . . ? 
N10 Ru2 N12 94.2(2) . . ? 
N10 Ru2 N7 170.7(2) . . ? 
N12 Ru2 N7 91.48(16) . . ? 
N10 Ru2 N9 78.7(2) . . ? 
N12 Ru2 N9 168.83(19) . . ? 
N7 Ru2 N9 96.72(19) . . ? 
N10 Ru2 N11 92.88(19) . . ? 
N12 Ru2 N11 79.08(19) . . ? 
N7 Ru2 N11 95.43(19) . . ? 
N9 Ru2 N11 92.55(19) . . ? 
N10 Ru2 N8 93.51(19) . . ? 
N12 Ru2 N8 94.79(19) . . ? 
N7 Ru2 N8 78.65(19) . . ? 
N9 Ru2 N8 94.25(19) . . ? 
N11 Ru2 N8 171.46(15) . . ? 
C64 Fe1 C62 88.9(3) . . ? 
C64 Fe1 C66 89.2(3) . . ? 
C62 Fe1 C66 88.0(3) . . ? 
C64 Fe1 C63 90.9(3) . . ? 
C62 Fe1 C63 89.8(3) . . ? 
C66 Fe1 C63 177.7(3) . . ? 
C64 Fe1 C61 178.7(4) . . ? 
C62 Fe1 C61 92.0(3) . . ? 
C66 Fe1 C61 89.9(3) . . ? 
C63 Fe1 C61 90.1(3) . . ? 
C64 Fe1 C65 91.2(3) . . ? 
C62 Fe1 C65 177.0(3) . . ? 
C66 Fe1 C65 95.1(3) . . ? 
C63 Fe1 C65 87.2(3) . . ? 
C61 Fe1 C65 88.0(3) . . ? 
C1 N1 C5 117.6(5) . . ? 
C1 N1 Ru1 127.2(4) . . ? 
C5 N1 Ru1 114.9(4) . . ? 
C10 N2 C6 118.2(6) . . ? 
C10 N2 Ru1 126.5(5) . . ? 
C6 N2 Ru1 115.3(4) . . ? 
C11 N3 C15 118.2(5) . . ? 
C11 N3 Ru1 126.4(5) . . ? 
C15 N3 Ru1 115.3(4) . . ? 
C20 N4 C16 116.7(5) . . ? 
C20 N4 Ru1 127.8(5) . . ? 
C16 N4 Ru1 115.4(4) . . ? 
C21 N5 C25 117.6(5) . . ? 
C21 N5 Ru1 126.3(5) . . ? 
C25 N5 Ru1 115.7(4) . . ? 
C30 N6 C26 117.9(5) . . ? 
C30 N6 Ru1 125.3(4) . . ? 
C26 N6 Ru1 115.7(4) . . ? 
C31 N7 C35 117.8(6) . . ? 
C31 N7 Ru2 126.4(5) . . ? 
C35 N7 Ru2 115.6(4) . . ? 
C40 N8 C36 117.0(5) . . ? 
C40 N8 Ru2 126.9(4) . . ? 
C36 N8 Ru2 115.8(4) . . ? 
C41 N9 C45 118.4(5) . . ? 
C41 N9 Ru2 125.5(4) . . ? 
C45 N9 Ru2 115.1(4) . . ? 
C50 N10 C46 117.8(5) . . ? 
C50 N10 Ru2 126.6(4) . . ? 
C46 N10 Ru2 115.2(4) . . ? 
C51 N11 C55 117.1(6) . . ? 
C51 N11 Ru2 127.5(5) . . ? 
C55 N11 Ru2 115.3(4) . . ? 
C60 N12 C56 118.8(5) . . ? 
C60 N12 Ru2 126.4(5) . . ? 
C56 N12 Ru2 114.6(4) . . ? 
N1 C1 C2 123.7(6) . . ? 
N1 C1 H1 118.1 . . ? 
C2 C1 H1 118.1 . . ? 
C1 C2 C3 119.3(7) . . ? 
C1 C2 H2 120.3 . . ? 
C3 C2 H2 120.3 . . ? 
C2 C3 C4 119.0(7) . . ? 
C2 C3 H3 120.5 . . ? 
C4 C3 H3 120.5 . . ? 
C5 C4 C3 118.8(7) . . ? 
C5 C4 H4 120.6 . . ? 
C3 C4 H4 120.6 . . ? 
N1 C5 C4 121.5(6) . . ? 
N1 C5 C6 115.7(5) . . ? 
C4 C5 C6 122.8(6) . . ? 
N2 C6 C7 120.6(6) . . ? 
N2 C6 C5 115.0(5) . . ? 
C7 C6 C5 124.3(6) . . ? 
C6 C7 C8 120.3(7) . . ? 
C6 C7 H7 119.9 . . ? 
C8 C7 H7 119.9 . . ? 
C9 C8 C7 118.2(7) . . ? 
C9 C8 H8 120.9 . . ? 
C7 C8 H8 120.9 . . ? 
C8 C9 C10 119.8(6) . . ? 
C8 C9 H9 120.1 . . ? 
C10 C9 H9 120.1 . . ? 
N2 C10 C9 122.9(7) . . ? 
N2 C10 H10 118.6 . . ? 
C9 C10 H10 118.6 . . ? 
N3 C11 C12 122.7(7) . . ? 
N3 C11 H11 118.7 . . ? 
C12 C11 H11 118.7 . . ? 
C11 C12 C13 119.6(7) . . ? 
C11 C12 H12 120.2 . . ? 
C13 C12 H12 120.2 . . ? 
C14 C13 C12 118.0(6) . . ? 
C14 C13 H13 121.0 . . ? 
C12 C13 H13 121.0 . . ? 
C13 C14 C15 120.4(6) . . ? 
C13 C14 H14 119.8 . . ? 
C15 C14 H14 119.8 . . ? 
N3 C15 C14 121.1(6) . . ? 
N3 C15 C16 115.7(5) . . ? 
C14 C15 C16 123.2(6) . . ? 
N4 C16 C17 121.4(6) . . ? 
N4 C16 C15 114.5(5) . . ? 
C17 C16 C15 123.9(6) . . ? 
C18 C17 C16 120.8(7) . . ? 
C18 C17 H17 119.6 . . ? 
C16 C17 H17 119.6 . . ? 
C17 C18 C19 118.3(7) . . ? 
C17 C18 H18 120.9 . . ? 
C19 C18 H18 120.9 . . ? 
C20 C19 C18 119.2(7) . . ? 
C20 C19 H19 120.4 . . ? 
C18 C19 H19 120.4 . . ? 
N4 C20 C19 123.6(7) . . ? 
N4 C20 H20 118.2 . . ? 
C19 C20 H20 118.2 . . ? 
N5 C21 C22 122.4(7) . . ? 
N5 C21 H21 118.8 . . ? 
C22 C21 H21 118.8 . . ? 
C23 C22 C21 118.8(7) . . ? 
C23 C22 H22 120.6 . . ? 
C21 C22 H22 120.6 . . ? 
C22 C23 C24 120.3(7) . . ? 
C22 C23 H23 119.9 . . ? 
C24 C23 H23 119.9 . . ? 
C23 C24 C25 120.0(8) . . ? 
C23 C24 H24 120.0 . . ? 
C25 C24 H24 120.0 . . ? 
N5 C25 C24 120.9(7) . . ? 
N5 C25 C26 114.6(5) . . ? 
C24 C25 C26 124.5(7) . . ? 
N6 C26 C27 120.6(6) . . ? 
N6 C26 C25 114.8(6) . . ? 
C27 C26 C25 124.6(6) . . ? 
C28 C27 C26 120.4(6) . . ? 
C28 C27 H27 119.8 . . ? 
C26 C27 H27 119.8 . . ? 
C27 C28 C29 119.1(7) . . ? 
C27 C28 H28 120.4 . . ? 
C29 C28 H28 120.4 . . ? 
C30 C29 C28 119.0(7) . . ? 
C30 C29 H29 120.5 . . ? 
C28 C29 H29 120.5 . . ? 
N6 C30 C29 122.8(6) . . ? 
N6 C30 H30 118.6 . . ? 
C29 C30 H30 118.6 . . ? 
N7 C31 C32 122.5(7) . . ? 
N7 C31 H31 118.8 . . ? 
C32 C31 H31 118.8 . . ? 
C33 C32 C31 119.6(7) . . ? 
C33 C32 H32 120.2 . . ? 
C31 C32 H32 120.2 . . ? 
C32 C33 C34 118.5(7) . . ? 
C32 C33 H33 120.7 . . ? 
C34 C33 H33 120.7 . . ? 
C33 C34 C35 119.8(7) . . ? 
C33 C34 H34 120.1 . . ? 
C35 C34 H34 120.1 . . ? 
N7 C35 C34 121.8(6) . . ? 
N7 C35 C36 115.0(5) . . ? 
C34 C35 C36 123.2(6) . . ? 
N8 C36 C37 121.9(6) . . ? 
N8 C36 C35 114.5(5) . . ? 
C37 C36 C35 123.6(6) . . ? 
C36 C37 C38 119.4(7) . . ? 
C36 C37 H37 120.3 . . ? 
C38 C37 H37 120.3 . . ? 
C39 C38 C37 119.1(7) . . ? 
C39 C38 H38 120.5 . . ? 
C37 C38 H38 120.5 . . ? 
C38 C39 C40 119.9(6) . . ? 
C38 C39 H39 120.1 . . ? 
C40 C39 H39 120.1 . . ? 
N8 C40 C39 122.7(6) . . ? 
N8 C40 H40 118.7 . . ? 
C39 C40 H40 118.7 . . ? 
N9 C41 C42 122.4(6) . . ? 
N9 C41 H41 118.8 . . ? 
C42 C41 H41 118.8 . . ? 
C41 C42 C43 119.1(7) . . ? 
C41 C42 H42 120.5 . . ? 
C43 C42 H42 120.5 . . ? 
C44 C43 C42 118.5(6) . . ? 
C44 C43 H43 120.7 . . ? 
C42 C43 H43 120.7 . . ? 
C43 C44 C45 119.9(6) . . ? 
C43 C44 H44 120.1 . . ? 
C45 C44 H44 120.1 . . ? 
N9 C45 C44 121.7(6) . . ? 
N9 C45 C46 115.8(6) . . ? 
C44 C45 C46 122.5(6) . . ? 
N10 C46 C47 120.8(6) . . ? 
N10 C46 C45 114.6(6) . . ? 
C47 C46 C45 124.6(7) . . ? 
C48 C47 C46 121.6(7) . . ? 
C48 C47 H47 119.2 . . ? 
C46 C47 H47 119.2 . . ? 
C47 C48 C49 117.3(7) . . ? 
C47 C48 H48 121.4 . . ? 
C49 C48 H48 121.4 . . ? 
C48 C49 C50 120.5(7) . . ? 
C48 C49 H49 119.7 . . ? 
C50 C49 H49 119.7 . . ? 
N10 C50 C49 121.9(7) . . ? 
N10 C50 H50 119.0 . . ? 
C49 C50 H50 119.0 . . ? 
N11 C51 C52 123.7(7) . . ? 
N11 C51 H51 118.2 . . ? 
C52 C51 H51 118.2 . . ? 
C51 C52 C53 118.9(7) . . ? 
C51 C52 H52 120.6 . . ? 
C53 C52 H52 120.5 . . ? 
C54 C53 C52 118.6(7) . . ? 
C54 C53 H53 120.7 . . ? 
C52 C53 H53 120.7 . . ? 
C53 C54 C55 120.4(7) . . ? 
C53 C54 H54 119.8 . . ? 
C55 C54 H54 119.8 . . ? 
N11 C55 C54 121.3(6) . . ? 
N11 C55 C56 114.7(5) . . ? 
C54 C55 C56 123.8(6) . . ? 
N12 C56 C57 120.2(6) . . ? 
N12 C56 C55 116.1(5) . . ? 
C57 C56 C55 123.7(6) . . ? 
C58 C57 C56 119.4(7) . . ? 
C58 C57 H57 120.3 . . ? 
C56 C57 H57 120.3 . . ? 
C59 C58 C57 120.0(7) . . ? 
C59 C58 H58 120.0 . . ? 
C57 C58 H58 120.0 . . ? 
C58 C59 C60 118.8(7) . . ? 
C58 C59 H59 120.6 . . ? 
C60 C59 H59 120.6 . . ? 
N12 C60 C59 122.7(7) . . ? 
N12 C60 H60 118.6 . . ? 
C59 C60 H60 118.6 . . ? 
N13 C61 Fe1 177.8(7) . . ? 
N14 C62 Fe1 176.8(6) . . ? 
N15 C63 Fe1 178.7(7) . . ? 
N16 C64 Fe1 177.0(7) . . ? 
N17 C65 Fe1 176.0(7) . . ? 
N18 C66 Fe1 176.5(6) . . ? 
H1A O1 H1B 111.6 . . ? 
H2A O2 H2B 111.2 . . ? 
H3A O3 H3B 111.5 . . ? 
H4A O4 H4B 110.8 . . ? 
H5A O5 H5B 111.1 . . ? 
H6A O6 H6B 136.6 . . ? 
H7A O7 H7B 111.4 . . ? 
  
loop_ 
 _geom_torsion_atom_site_label_1 
 _geom_torsion_atom_site_label_2 
 _geom_torsion_atom_site_label_3 
 _geom_torsion_atom_site_label_4 
 _geom_torsion 
 _geom_torsion_site_symmetry_1 
 _geom_torsion_site_symmetry_2 
 _geom_torsion_site_symmetry_3 
 _geom_torsion_site_symmetry_4 
 _geom_torsion_publ_flag 
N3 Ru1 N1 C1 87.6(5) . . . . ? 
N5 Ru1 N1 C1 -7.7(6) . . . . ? 
N6 Ru1 N1 C1 -86.4(5) . . . . ? 
N4 Ru1 N1 C1 132.1(11) . . . . ? 
N2 Ru1 N1 C1 177.1(6) . . . . ? 
N3 Ru1 N1 C5 -85.7(4) . . . . ? 
N5 Ru1 N1 C5 179.0(4) . . . . ? 
N6 Ru1 N1 C5 100.3(4) . . . . ? 
N4 Ru1 N1 C5 -41.2(14) . . . . ? 
N2 Ru1 N1 C5 3.8(4) . . . . ? 
N3 Ru1 N2 C10 -87.8(5) . . . . ? 
N5 Ru1 N2 C10 148.6(10) . . . . ? 
N6 Ru1 N2 C10 84.7(5) . . . . ? 
N4 Ru1 N2 C10 -8.9(5) . . . . ? 
N1 Ru1 N2 C10 177.7(5) . . . . ? 
N3 Ru1 N2 C6 93.9(4) . . . . ? 
N5 Ru1 N2 C6 -29.7(13) . . . . ? 
N6 Ru1 N2 C6 -93.6(4) . . . . ? 
N4 Ru1 N2 C6 172.8(4) . . . . ? 
N1 Ru1 N2 C6 -0.6(4) . . . . ? 
N5 Ru1 N3 C11 85.5(5) . . . . ? 
N6 Ru1 N3 C11 138.1(9) . . . . ? 
N4 Ru1 N3 C11 179.2(6) . . . . ? 
N1 Ru1 N3 C11 -7.5(6) . . . . ? 
N2 Ru1 N3 C11 -86.3(5) . . . . ? 
N5 Ru1 N3 C15 -90.0(4) . . . . ? 
N6 Ru1 N3 C15 -37.3(12) . . . . ? 
N4 Ru1 N3 C15 3.7(4) . . . . ? 
N1 Ru1 N3 C15 177.0(4) . . . . ? 
N2 Ru1 N3 C15 98.2(4) . . . . ? 
N3 Ru1 N4 C20 174.1(6) . . . . ? 
N5 Ru1 N4 C20 -91.6(6) . . . . ? 
N6 Ru1 N4 C20 -12.8(6) . . . . ? 
N1 Ru1 N4 C20 128.7(12) . . . . ? 
N2 Ru1 N4 C20 84.7(6) . . . . ? 
N3 Ru1 N4 C16 -1.1(4) . . . . ? 
N5 Ru1 N4 C16 93.2(4) . . . . ? 
N6 Ru1 N4 C16 171.9(4) . . . . ? 
N1 Ru1 N4 C16 -46.5(14) . . . . ? 
N2 Ru1 N4 C16 -90.6(4) . . . . ? 
N3 Ru1 N5 C21 -14.5(5) . . . . ? 
N6 Ru1 N5 C21 174.1(5) . . . . ? 
N4 Ru1 N5 C21 -93.7(5) . . . . ? 
N1 Ru1 N5 C21 80.2(5) . . . . ? 
N2 Ru1 N5 C21 108.8(12) . . . . ? 
N3 Ru1 N5 C25 172.5(4) . . . . ? 
N6 Ru1 N5 C25 1.1(4) . . . . ? 
N4 Ru1 N5 C25 93.2(4) . . . . ? 
N1 Ru1 N5 C25 -92.8(4) . . . . ? 
N2 Ru1 N5 C25 -64.3(12) . . . . ? 
N3 Ru1 N6 C30 117.8(10) . . . . ? 
N5 Ru1 N6 C30 171.7(5) . . . . ? 
N4 Ru1 N6 C30 77.6(5) . . . . ? 
N1 Ru1 N6 C30 -96.6(5) . . . . ? 
N2 Ru1 N6 C30 -17.3(5) . . . . ? 
N3 Ru1 N6 C26 -50.0(12) . . . . ? 
N5 Ru1 N6 C26 3.9(4) . . . . ? 
N4 Ru1 N6 C26 -90.2(4) . . . . ? 
N1 Ru1 N6 C26 95.7(4) . . . . ? 
N2 Ru1 N6 C26 174.9(4) . . . . ? 
N10 Ru2 N7 C31 -143.2(11) . . . . ? 
N12 Ru2 N7 C31 89.2(5) . . . . ? 
N9 Ru2 N7 C31 -83.2(5) . . . . ? 
N11 Ru2 N7 C31 10.0(5) . . . . ? 
N8 Ru2 N7 C31 -176.2(5) . . . . ? 
N10 Ru2 N7 C35 33.2(14) . . . . ? 
N12 Ru2 N7 C35 -94.4(4) . . . . ? 
N9 Ru2 N7 C35 93.2(4) . . . . ? 
N11 Ru2 N7 C35 -173.5(4) . . . . ? 
N8 Ru2 N7 C35 0.2(4) . . . . ? 
N10 Ru2 N8 C40 7.2(5) . . . . ? 
N12 Ru2 N8 C40 -87.3(5) . . . . ? 
N7 Ru2 N8 C40 -177.8(6) . . . . ? 
N9 Ru2 N8 C40 86.1(5) . . . . ? 
N11 Ru2 N8 C40 -131.1(14) . . . . ? 
N10 Ru2 N8 C36 -178.8(4) . . . . ? 
N12 Ru2 N8 C36 86.7(4) . . . . ? 
N7 Ru2 N8 C36 -3.9(4) . . . . ? 
N9 Ru2 N8 C36 -99.9(4) . . . . ? 
N11 Ru2 N8 C36 42.8(17) . . . . ? 
N10 Ru2 N9 C41 -172.7(5) . . . . ? 
N12 Ru2 N9 C41 -121.5(10) . . . . ? 
N7 Ru2 N9 C41 15.5(6) . . . . ? 
N11 Ru2 N9 C41 -80.3(5) . . . . ? 
N8 Ru2 N9 C41 94.6(5) . . . . ? 
N10 Ru2 N9 C45 -4.2(5) . . . . ? 
N12 Ru2 N9 C45 47.0(11) . . . . ? 
N7 Ru2 N9 C45 -176.0(4) . . . . ? 
N11 Ru2 N9 C45 88.2(4) . . . . ? 
N8 Ru2 N9 C45 -97.0(5) . . . . ? 
N12 Ru2 N10 C50 14.5(5) . . . . ? 
N7 Ru2 N10 C50 -112.9(12) . . . . ? 
N9 Ru2 N10 C50 -174.2(5) . . . . ? 
N11 Ru2 N10 C50 93.8(5) . . . . ? 
N8 Ru2 N10 C50 -80.5(5) . . . . ? 
N12 Ru2 N10 C46 -171.7(4) . . . . ? 
N7 Ru2 N10 C46 60.9(13) . . . . ? 
N9 Ru2 N10 C46 -0.4(4) . . . . ? 
N11 Ru2 N10 C46 -92.5(4) . . . . ? 
N8 Ru2 N10 C46 93.2(4) . . . . ? 
N10 Ru2 N11 C51 92.5(5) . . . . ? 
N12 Ru2 N11 C51 -173.8(6) . . . . ? 
N7 Ru2 N11 C51 -83.3(5) . . . . ? 
N9 Ru2 N11 C51 13.7(5) . . . . ? 
N8 Ru2 N11 C51 -129.1(14) . . . . ? 
N10 Ru2 N11 C55 -91.1(4) . . . . ? 
N12 Ru2 N11 C55 2.6(4) . . . . ? 
N7 Ru2 N11 C55 93.1(4) . . . . ? 
N9 Ru2 N11 C55 -169.9(4) . . . . ? 
N8 Ru2 N11 C55 47.3(16) . . . . ? 
N10 Ru2 N12 C60 -87.1(5) . . . . ? 
N7 Ru2 N12 C60 85.5(5) . . . . ? 
N9 Ru2 N12 C60 -137.2(9) . . . . ? 
N11 Ru2 N12 C60 -179.2(5) . . . . ? 
N8 Ru2 N12 C60 6.8(5) . . . . ? 
N10 Ru2 N12 C56 87.1(4) . . . . ? 
N7 Ru2 N12 C56 -100.3(4) . . . . ? 
N9 Ru2 N12 C56 37.1(11) . . . . ? 
N11 Ru2 N12 C56 -5.0(4) . . . . ? 
N8 Ru2 N12 C56 -179.0(4) . . . . ? 
C5 N1 C1 C2 1.3(10) . . . . ? 
Ru1 N1 C1 C2 -171.9(6) . . . . ? 
N1 C1 C2 C3 -0.5(12) . . . . ? 
C1 C2 C3 C4 -0.8(12) . . . . ? 
C2 C3 C4 C5 1.3(11) . . . . ? 
C1 N1 C5 C4 -0.8(9) . . . . ? 
Ru1 N1 C5 C4 173.2(5) . . . . ? 
C1 N1 C5 C6 179.8(5) . . . . ? 
Ru1 N1 C5 C6 -6.2(7) . . . . ? 
C3 C4 C5 N1 -0.5(10) . . . . ? 
C3 C4 C5 C6 178.9(6) . . . . ? 
C10 N2 C6 C7 -1.2(9) . . . . ? 
Ru1 N2 C6 C7 177.3(5) . . . . ? 
C10 N2 C6 C5 179.1(5) . . . . ? 
Ru1 N2 C6 C5 -2.4(7) . . . . ? 
N1 C5 C6 N2 5.7(8) . . . . ? 
C4 C5 C6 N2 -173.7(6) . . . . ? 
N1 C5 C6 C7 -174.0(6) . . . . ? 
C4 C5 C6 C7 6.6(10) . . . . ? 
N2 C6 C7 C8 0.3(10) . . . . ? 
C5 C6 C7 C8 180.0(6) . . . . ? 
C6 C7 C8 C9 1.2(11) . . . . ? 
C7 C8 C9 C10 -1.7(11) . . . . ? 
C6 N2 C10 C9 0.7(10) . . . . ? 
Ru1 N2 C10 C9 -177.6(5) . . . . ? 
C8 C9 C10 N2 0.8(11) . . . . ? 
C15 N3 C11 C12 1.4(10) . . . . ? 
Ru1 N3 C11 C12 -174.0(5) . . . . ? 
N3 C11 C12 C13 0.9(12) . . . . ? 
C11 C12 C13 C14 -1.6(11) . . . . ? 
C12 C13 C14 C15 0.0(10) . . . . ? 
C11 N3 C15 C14 -3.0(9) . . . . ? 
Ru1 N3 C15 C14 172.9(5) . . . . ? 
C11 N3 C15 C16 178.6(6) . . . . ? 
Ru1 N3 C15 C16 -5.6(7) . . . . ? 
C13 C14 C15 N3 2.3(10) . . . . ? 
C13 C14 C15 C16 -179.3(6) . . . . ? 
C20 N4 C16 C17 -1.7(9) . . . . ? 
Ru1 N4 C16 C17 174.1(5) . . . . ? 
C20 N4 C16 C15 -177.2(5) . . . . ? 
Ru1 N4 C16 C15 -1.4(7) . . . . ? 
N3 C15 C16 N4 4.6(8) . . . . ? 
C14 C15 C16 N4 -173.8(6) . . . . ? 
N3 C15 C16 C17 -170.8(6) . . . . ? 
C14 C15 C16 C17 10.8(10) . . . . ? 
N4 C16 C17 C18 -0.5(10) . . . . ? 
C15 C16 C17 C18 174.7(6) . . . . ? 
C16 C17 C18 C19 2.1(11) . . . . ? 
C17 C18 C19 C20 -1.5(12) . . . . ? 
C16 N4 C20 C19 2.3(10) . . . . ? 
Ru1 N4 C20 C19 -172.9(6) . . . . ? 
C18 C19 C20 N4 -0.8(12) . . . . ? 
C25 N5 C21 C22 0.4(9) . . . . ? 
Ru1 N5 C21 C22 -172.5(5) . . . . ? 
N5 C21 C22 C23 -0.5(11) . . . . ? 
C21 C22 C23 C24 0.0(12) . . . . ? 
C22 C23 C24 C25 0.5(12) . . . . ? 
C21 N5 C25 C24 0.1(9) . . . . ? 
Ru1 N5 C25 C24 173.8(5) . . . . ? 
C21 N5 C25 C26 -179.2(5) . . . . ? 
Ru1 N5 C25 C26 -5.6(6) . . . . ? 
C23 C24 C25 N5 -0.6(11) . . . . ? 
C23 C24 C25 C26 178.7(7) . . . . ? 
C30 N6 C26 C27 2.3(9) . . . . ? 
Ru1 N6 C26 C27 171.0(5) . . . . ? 
C30 N6 C26 C25 -176.7(5) . . . . ? 
Ru1 N6 C26 C25 -8.0(7) . . . . ? 
N5 C25 C26 N6 8.9(8) . . . . ? 
C24 C25 C26 N6 -170.5(6) . . . . ? 
N5 C25 C26 C27 -170.1(6) . . . . ? 
C24 C25 C26 C27 10.6(10) . . . . ? 
N6 C26 C27 C28 -4.6(10) . . . . ? 
C25 C26 C27 C28 174.3(7) . . . . ? 
C26 C27 C28 C29 3.4(11) . . . . ? 
C27 C28 C29 C30 0.0(11) . . . . ? 
C26 N6 C30 C29 1.2(9) . . . . ? 
Ru1 N6 C30 C29 -166.3(5) . . . . ? 
C28 C29 C30 N6 -2.4(11) . . . . ? 
C35 N7 C31 C32 -0.6(9) . . . . ? 
Ru2 N7 C31 C32 175.8(5) . . . . ? 
N7 C31 C32 C33 1.2(11) . . . . ? 
C31 C32 C33 C34 -0.9(11) . . . . ? 
C32 C33 C34 C35 0.1(11) . . . . ? 
C31 N7 C35 C34 -0.2(9) . . . . ? 
Ru2 N7 C35 C34 -177.0(5) . . . . ? 
C31 N7 C35 C36 179.9(5) . . . . ? 
Ru2 N7 C35 C36 3.1(7) . . . . ? 
C33 C34 C35 N7 0.4(10) . . . . ? 
C33 C34 C35 C36 -179.7(6) . . . . ? 
C40 N8 C36 C37 -0.1(9) . . . . ? 
Ru2 N8 C36 C37 -174.7(5) . . . . ? 
C40 N8 C36 C35 -178.8(5) . . . . ? 
Ru2 N8 C36 C35 6.6(7) . . . . ? 
N7 C35 C36 N8 -6.4(8) . . . . ? 
C34 C35 C36 N8 173.7(6) . . . . ? 
N7 C35 C36 C37 174.9(6) . . . . ? 
C34 C35 C36 C37 -5.0(10) . . . . ? 
N8 C36 C37 C38 1.1(10) . . . . ? 
C35 C36 C37 C38 179.7(6) . . . . ? 
C36 C37 C38 C39 -0.5(11) . . . . ? 
C37 C38 C39 C40 -1.0(11) . . . . ? 
C36 N8 C40 C39 -1.5(9) . . . . ? 
Ru2 N8 C40 C39 172.4(5) . . . . ? 
C38 C39 C40 N8 2.1(11) . . . . ? 
C45 N9 C41 C42 -2.1(10) . . . . ? 
Ru2 N9 C41 C42 166.1(5) . . . . ? 
N9 C41 C42 C43 3.5(11) . . . . ? 
C41 C42 C43 C44 -1.9(10) . . . . ? 
C42 C43 C44 C45 -0.8(10) . . . . ? 
C41 N9 C45 C44 -0.8(9) . . . . ? 
Ru2 N9 C45 C44 -170.1(5) . . . . ? 
C41 N9 C45 C46 177.3(6) . . . . ? 
Ru2 N9 C45 C46 8.0(7) . . . . ? 
C43 C44 C45 N9 2.2(10) . . . . ? 
C43 C44 C45 C46 -175.8(6) . . . . ? 
C50 N10 C46 C47 -0.1(9) . . . . ? 
Ru2 N10 C46 C47 -174.4(5) . . . . ? 
C50 N10 C46 C45 179.0(5) . . . . ? 
Ru2 N10 C46 C45 4.7(6) . . . . ? 
N9 C45 C46 N10 -8.4(8) . . . . ? 
C44 C45 C46 N10 169.7(6) . . . . ? 
N9 C45 C46 C47 170.6(6) . . . . ? 
C44 C45 C46 C47 -11.3(10) . . . . ? 
N10 C46 C47 C48 0.7(10) . . . . ? 
C45 C46 C47 C48 -178.3(7) . . . . ? 
C46 C47 C48 C49 0.0(11) . . . . ? 
C47 C48 C49 C50 -1.2(11) . . . . ? 
C46 N10 C50 C49 -1.2(9) . . . . ? 
Ru2 N10 C50 C49 172.4(5) . . . . ? 
C48 C49 C50 N10 1.9(10) . . . . ? 
C55 N11 C51 C52 -1.8(10) . . . . ? 
Ru2 N11 C51 C52 174.6(5) . . . . ? 
N11 C51 C52 C53 1.3(12) . . . . ? 
C51 C52 C53 C54 -1.2(12) . . . . ? 
C52 C53 C54 C55 1.7(11) . . . . ? 
C51 N11 C55 C54 2.2(9) . . . . ? 
Ru2 N11 C55 C54 -174.6(5) . . . . ? 
C51 N11 C55 C56 176.8(5) . . . . ? 
Ru2 N11 C55 C56 0.1(6) . . . . ? 
C53 C54 C55 N11 -2.2(10) . . . . ? 
C53 C54 C55 C56 -176.4(6) . . . . ? 
C60 N12 C56 C57 4.3(9) . . . . ? 
Ru2 N12 C56 C57 -170.4(5) . . . . ? 
C60 N12 C56 C55 -178.7(5) . . . . ? 
Ru2 N12 C56 C55 6.6(6) . . . . ? 
N11 C55 C56 N12 -4.4(8) . . . . ? 
C54 C55 C56 N12 170.1(6) . . . . ? 
N11 C55 C56 C57 172.4(6) . . . . ? 
C54 C55 C56 C57 -13.1(10) . . . . ? 
N12 C56 C57 C58 -1.9(10) . . . . ? 
C55 C56 C57 C58 -178.7(6) . . . . ? 
C56 C57 C58 C59 -1.9(11) . . . . ? 
C57 C58 C59 C60 3.1(11) . . . . ? 
C56 N12 C60 C59 -3.1(9) . . . . ? 
Ru2 N12 C60 C59 170.9(5) . . . . ? 
C58 C59 C60 N12 -0.7(11) . . . . ? 
C64 Fe1 C61 N13 -102(26) . . . . ? 
C62 Fe1 C61 N13 126(21) . . . . ? 
C66 Fe1 C61 N13 -146(21) . . . . ? 
C63 Fe1 C61 N13 36(21) . . . . ? 
C65 Fe1 C61 N13 -51(21) . . . . ? 
C64 Fe1 C62 N14 9(12) . . . . ? 
C66 Fe1 C62 N14 99(12) . . . . ? 
C63 Fe1 C62 N14 -81(12) . . . . ? 
C61 Fe1 C62 N14 -172(12) . . . . ? 
C65 Fe1 C62 N14 -83(14) . . . . ? 
C64 Fe1 C63 N15 94(30) . . . . ? 
C62 Fe1 C63 N15 -177(100) . . . . ? 
C66 Fe1 C63 N15 -175(100) . . . . ? 
C61 Fe1 C63 N15 -85(30) . . . . ? 
C65 Fe1 C63 N15 3(30) . . . . ? 
C62 Fe1 C64 N16 -31(15) . . . . ? 
C66 Fe1 C64 N16 -119(15) . . . . ? 
C63 Fe1 C64 N16 59(15) . . . . ? 
C61 Fe1 C64 N16 -163(13) . . . . ? 
C65 Fe1 C64 N16 146(15) . . . . ? 
C64 Fe1 C65 N17 -95(9) . . . . ? 
C62 Fe1 C65 N17 -3(14) . . . . ? 
C66 Fe1 C65 N17 175(100) . . . . ? 
C63 Fe1 C65 N17 -4(9) . . . . ? 
C61 Fe1 C65 N17 86(9) . . . . ? 
C64 Fe1 C66 N18 69(11) . . . . ? 
C62 Fe1 C66 N18 -20(11) . . . . ? 
C63 Fe1 C66 N18 -22(18) . . . . ? 
C61 Fe1 C66 N18 -112(11) . . . . ? 
C65 Fe1 C66 N18 160(11) . . . . ? 
  
loop_ 
 _geom_hbond_atom_site_label_D 
 _geom_hbond_atom_site_label_H 
 _geom_hbond_atom_site_label_A 
 _geom_hbond_distance_DH 
 _geom_hbond_distance_HA 
 _geom_hbond_distance_DA 
 _geom_hbond_angle_DHA 
 _geom_hbond_site_symmetry_A 
O1 H1A N17  0.85 2.06 2.896(8) 169.7 . 
O1 H1B O6  0.86 2.29 2.832(7) 120.8 3_455 
O2 H2A N15  0.86 1.97 2.805(9) 163.6 . 
O2 H2B I1  0.85 2.77 3.571(5) 157.8 1_655 
O3 H3A I1  0.85 2.77 3.551(6) 152.8 4_564 
O3 H3B N14  0.85 2.25 2.987(9) 144.2 2_564 
O4 H4A N13  0.85 1.99 2.754(8) 149.2 2_564 
O4 H4B N16  0.85 2.04 2.709(8) 134.3 . 
O5 H5A N18  0.85 1.97 2.803(8) 169.6 1_655 
O5 H5B O2  0.85 2.02 2.859(6) 169.8 . 
O6 H6A O1  0.85 1.99 2.832(7) 177.8 3_545 
O6 H6B O5  0.86 2.27 2.743(7) 115.0 . 
O7 H7A N14  0.85 2.16 2.997(11) 170.8 . 
O7 H7B N15  0.85 2.75 3.436(10) 139.6 . 
  
_diffrn_measured_fraction_theta_max    0.997 
_diffrn_reflns_theta_full              26.43 
_diffrn_measured_fraction_theta_full   0.997 
_refine_diff_density_max    0.505 
_refine_diff_density_min   -0.511 
_refine_diff_density_rms    0.078 
